# Supplementary material
Source: MDPI journal article supplement (https://www.mdpi.com/2073-4441/15/12/2294)
Supplement: s1 [file s1]

**Table S1:** Influence of irrigation on maize plant parameters under drip irrigation with biochar and inorganic fertilizer for 2016, 2017 and 2018 growing season

| Amendments              | 0(B <sub>0</sub> )               | 3(B <sub>3</sub> ) | 6(B <sub>6</sub> ) | 10(B <sub>10</sub> ) | Mean     |
|-------------------------|----------------------------------|--------------------|--------------------|----------------------|----------|
| <b>2016</b>             |                                  |                    |                    |                      |          |
| Fertiliser (kg/ha)      | Plant height (cm)                |                    |                    |                      |          |
| 0 (F <sub>0</sub> )     | 90.48b                           | 110.89ab           | 114.84ab           | 121.34a              | 109.39B  |
| 300 (F <sub>300</sub> ) | 127.71a                          | 143.66ab           | 146.18ab           | 152.63b              | 142.55A  |
| Mean                    | 109.9B                           | 127.28A            | 130.51A            | 136.99A              |          |
| <b>2017</b>             |                                  |                    |                    |                      |          |
|                         | Leaf area index                  |                    |                    |                      |          |
| 0 (F <sub>0</sub> )     | 1.21a                            | 1.78a              | 2.06a              | 2.15a                | 1.80B    |
| 300 (F <sub>300</sub> ) | 2.22b                            | 2.69ab             | 2.91ab             | 2.99a                | 2.70A    |
| Mean                    | 1.72B                            | 2.24A              | 2.49A              | 2.57A                |          |
| <b>2018</b>             |                                  |                    |                    |                      |          |
| Irrigation Treatment    | Amendments                       | LAI                | PH (cm)            | LAI                  | PH (cm)  |
|                         |                                  | 2017               |                    | 2018                 |          |
| 100% FIT                | F <sub>300</sub> B <sub>20</sub> | 3.12a              | 160.48a            | 2.34a                | 148.31a  |
|                         | F <sub>300</sub> B <sub>0</sub>  | 2.89ab             | 157.61ab           | 2.13ab               | 145.44ab |
|                         | F <sub>0</sub> B <sub>20</sub>   | 2.56b              | 151.14ab           | 1.82b                | 138.98ab |
|                         | F <sub>0</sub> B <sub>0</sub>    | 2.38b              | 145.99b            | 1.67b                | 133.83b  |
| 80% FIT                 | F <sub>300</sub> B <sub>20</sub> | 2.96b              | 159.11b            | 2.20b                | 146.94b  |
|                         | F <sub>300</sub> B <sub>0</sub>  | 2.82b              | 153.98b            | 2.13b                | 141.82b  |
|                         | F <sub>0</sub> B <sub>20</sub>   | 2.45b              | 149.71b            | 1.74b                | 137.54b  |
|                         | F <sub>0</sub> B <sub>0</sub>    | 2.37b              | 143.53b            | 1.65b                | 131.37b  |
| 60% FIT                 | F <sub>300</sub> B <sub>20</sub> | 2.96a              | 151.71a            | 1.91c                | 139.54a  |
|                         | F <sub>300</sub> B <sub>0</sub>  | 2.50ab             | 150.34a            | 1.78c                | 138.99a  |
|                         | F <sub>0</sub> B <sub>20</sub>   | 2.30ab             | 134.96a            | 1.50c                | 122.80a  |
|                         | F <sub>0</sub> B <sub>0</sub>    | 1.62b              | 110.29b            | 1.22c                | 98.12b   |

**Table S2:** Maize productivity as affected by biochar, inorganic fertilizer under varying water application in 2017 growing season

| Irrigation Treatments | Amendments                       | Grain yield (t/ha) | Biomass yield (t/ha) | Maize cob yield (t/ha) |
|-----------------------|----------------------------------|--------------------|----------------------|------------------------|
| 100% FIT              | F <sub>300</sub> B <sub>20</sub> | 6.35a              | 17.57a               | 4.95a                  |
|                       | F <sub>300</sub> B <sub>0</sub>  | 5.48ab             | 16.85a               | 4.94a                  |
|                       | F <sub>0</sub> B <sub>20</sub>   | 4.98ab             | 14.80ab              | 4.66ab                 |
|                       | F <sub>0</sub> B <sub>0</sub>    | 3.88b              | 11.76b               | 3.65b                  |
| 80% FIT               | F <sub>300</sub> B <sub>20</sub> | 6.00a              | 17.24a               | 4.75a                  |
|                       | F <sub>300</sub> B <sub>0</sub>  | 5.44ab             | 15.74ab              | 4.34ab                 |
|                       | F <sub>0</sub> B <sub>20</sub>   | 4.48bc             | 12.46bc              | 3.72ab                 |
|                       | F <sub>0</sub> B <sub>0</sub>    | 3.75c              | 11.33c               | 3.31b                  |
| 60% FIT               | F <sub>300</sub> B <sub>20</sub> | 5.32a              | 14.88a               | 4.14a                  |
|                       | F <sub>300</sub> B <sub>0</sub>  | 4.85ab             | 12.49a               | 4.11a                  |
|                       | F <sub>0</sub> B <sub>20</sub>   | 3.54bc             | 11.31ab              | 3.28b                  |
|                       | F <sub>0</sub> B <sub>0</sub>    | 2.57c              | 7.20b                | 1.98c                  |

Means that share the same letter are not significantly different at 5% level of significance

**Table S3:** Maize productivity as affected by biochar, inorganic fertilizer under varying water application in 2018 growing season

| Irrigation Treatments | Amendments                       | Grain yield (t/ha) | Biomass yield (t/ha) | Maize cob yield (t/ha) |
|-----------------------|----------------------------------|--------------------|----------------------|------------------------|
| 100% FIT              | F <sub>300</sub> B <sub>20</sub> | 5.24a              | 10.35a               | 3.39a                  |
|                       | F <sub>300</sub> B <sub>0</sub>  | 4.77ab             | 10.14a               | 3.31a                  |
|                       | F <sub>0</sub> B <sub>20</sub>   | 4.43bc             | 6.79b                | 3.30a                  |
|                       | F <sub>0</sub> B <sub>0</sub>    | 3.85c              | 6.06b                | 2.55b                  |
| 80% FIT               | F <sub>300</sub> B <sub>20</sub> | 4.92a              | 10.27a               | 3.37a                  |
|                       | F <sub>300</sub> B <sub>0</sub>  | 4.46ab             | 8.79a                | 3.31a                  |
|                       | F <sub>0</sub> B <sub>20</sub>   | 3.93b              | 7.30a                | 2.29b                  |
|                       | F <sub>0</sub> B <sub>0</sub>    | 3.70b              | 3.73b                | 2.09b                  |
| 60% FIT               | F <sub>300</sub> B <sub>20</sub> | 4.34a              | 7.62a                | 3.15a                  |
|                       | F <sub>300</sub> B <sub>0</sub>  | 3.76b              | 5.44b                | 3.03a                  |
|                       | F <sub>0</sub> B <sub>20</sub>   | 2.85c              | 4.98b                | 2.13b                  |
|                       | F <sub>0</sub> B <sub>0</sub>    | 2.53c              | 2.13c                | 1.11c                  |

Means that share the same letter are not significantly different at 5% level of significance

**Table S4:** Effect of irrigation treatment on the maize grain yield using one-way ANOVA

| Experiments    | Irrigation treatments | Grain yield (t/ha) |
|----------------|-----------------------|--------------------|
| Experiment II  | 100% FIT              | 3.88a              |
|                | 80% FIT               | 3.75a              |
|                | 60% FIT               | 2.57b              |
| Experiment III | 100% FIT              | 3.85a              |
|                | 80% FIT               | 3.70a              |
|                | 60% FIT               | 2.53b              |
| Average        | 100%FIT               | 3.87a              |
|                | 80%FIT                | 3.73a              |
|                | 60%FIT                | 2.55b              |

Means that share the same letter are not significantly different at 5% level of significance
